# Supplementary material
Source: publisher site journal article supplement (https://www.dovepress.com/get_supplementary_file.php?f=490712.docx)
Supplement: Supplementary file 1 [file get_supplementary_file.php]

**SUPPLEMENTARY MATERIAL**

**Table S1**. Descriptive statistics of measurement items

| Node | items | content | RMSE | Predictability (R2) |
| --- | --- | --- | --- | --- |
| PHQ9-1 | Anhedonia | Little interest or pleasure in doing things | 0.577 | 0.667 |
| PHQ9-2 | Depressed mood | Feeling down, depressed, or hopeless | 0.534 | 0.715 |
| PHQ9-3 | Sleep | Trouble falling or staying asleep, or sleeping too much | 0.613 | 0.624 |
| PHQ9-4 | Energy | Feeling tired or having little energy | 0.538 | 0.711 |
| PHQ9-5 | Appetite | Poor appetite or overeating | 0.621 | 0.614 |
| PHQ9-6 | Guilty | Feeling bad about yourself-or that you are a failure or have let yourself or your family down | 0.559 | 0.687 |
| PHQ9-7 | Consideration | Trouble concentrating on things, such as reading the newspaper or watching television | 0.608 | 0.63 |
| PHQ9-8 | Motor | Moving or speaking so slowly that other people could have noticed | 0.563 | 0.683 |
| PHQ9-9 | Suicidal ideation | Thoughts that you would be better off dead, or thoughts of hurting yourself in some way | 0.66 | 0.565 |
| GAD7-1 | Nervousness | Feeling nervous, anxious, or on edge | 0.482 | 0.768 |
| GAD7-2 | Uncontrollable worry | Not being able to stop or control worrying | 0.462 | 0.786 |
| GAD7-3 | Excessive worry | Worrying too much about different things | 0.455 | 0.793 |
| GAD7-4 | Trouble relaxing | Trouble relaxing | 0.483 | 0.767 |
| GAD7-5 | Restlessness | Being so restless that it's hard to sit still | 0.475 | 0.775 |
| GAD7-6 | Irritability | Becoming easily annoyed or irritable | 0.487 | 0.762 |
| GAD7-7 | Negative future anticipation | Feeling afraid as if something awful might happen | 0.508 | 0.742 |
| APGAR1 | Adaptation | utilization of resources for problem-solving when family equilibrium during a crisis | 0.592 | 0.649 |
| APGAR2 | Partnership | sharing of decision-making and nurturing  responsibilities among family members | 0.497 | 0.752 |
| APGAR3 | Growth | physical and emotional maturation and self-fulfillment achieved by family members through mutual support and guidance | 0.556 | 0.691 |
| APGAR4 | Affection | caring or loving relationship between family members | 0.537 | 0.712 |
| APGAR5 | Resolve | commitment to devote time to other family members for physical and emotional nurturing | 0.624 | 0.61 |

PHQ9: the 9-item Patient Health Questionnaire; GAD7: 7-item Generalized Anxiety Disorder Scale; APGAR: The Family APGAR Index Questionnaire


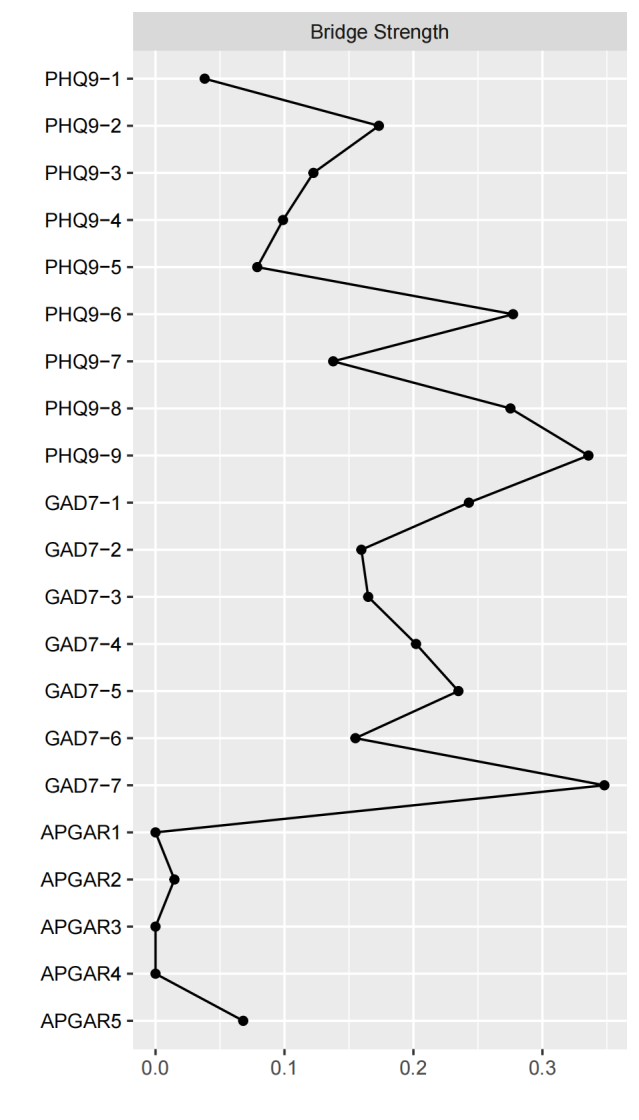


**Figure S1.** The bridge symptoms of anxiety, depression and family adaption symptoms in higher vocational school students.


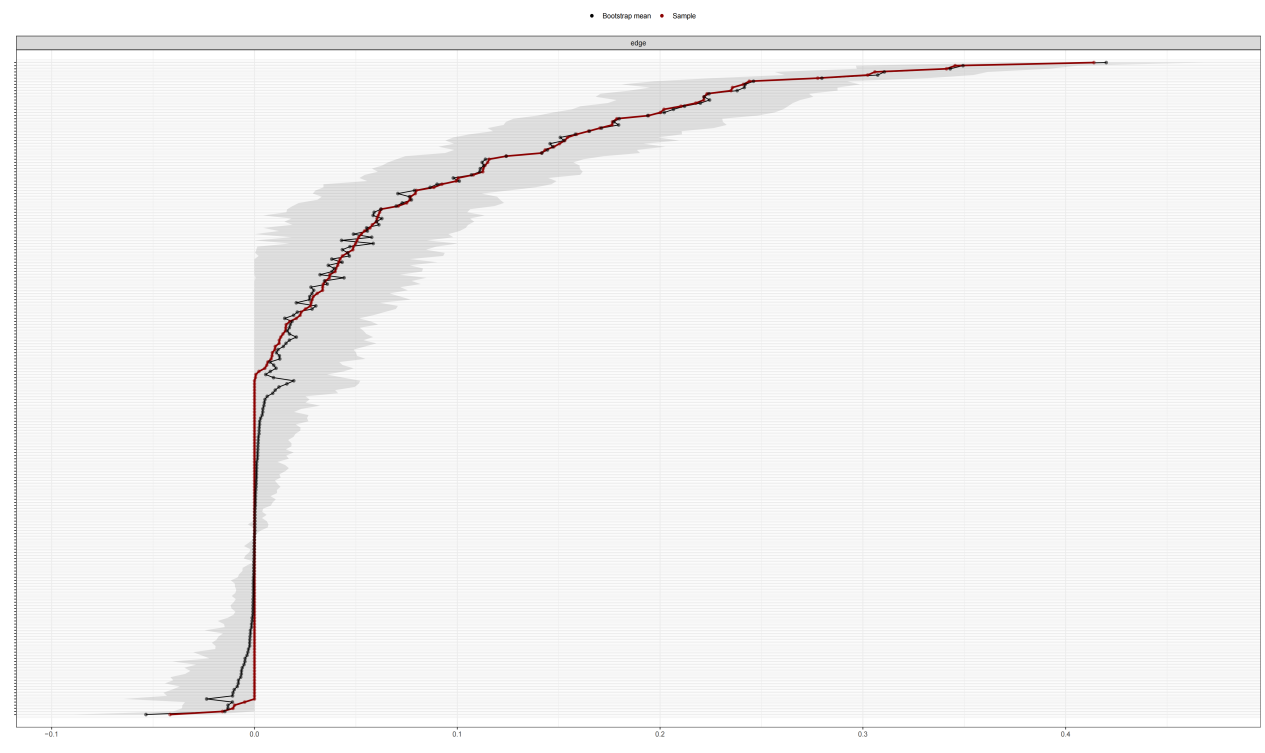


Figure S2. Bootstrapped confidence intervals of edge weights. The red dots represent the values of each edge weight. The gray area corresponds to the 95% Confidence Intervals of edge weights, calculated using the non-parametric bootstrap procedure.


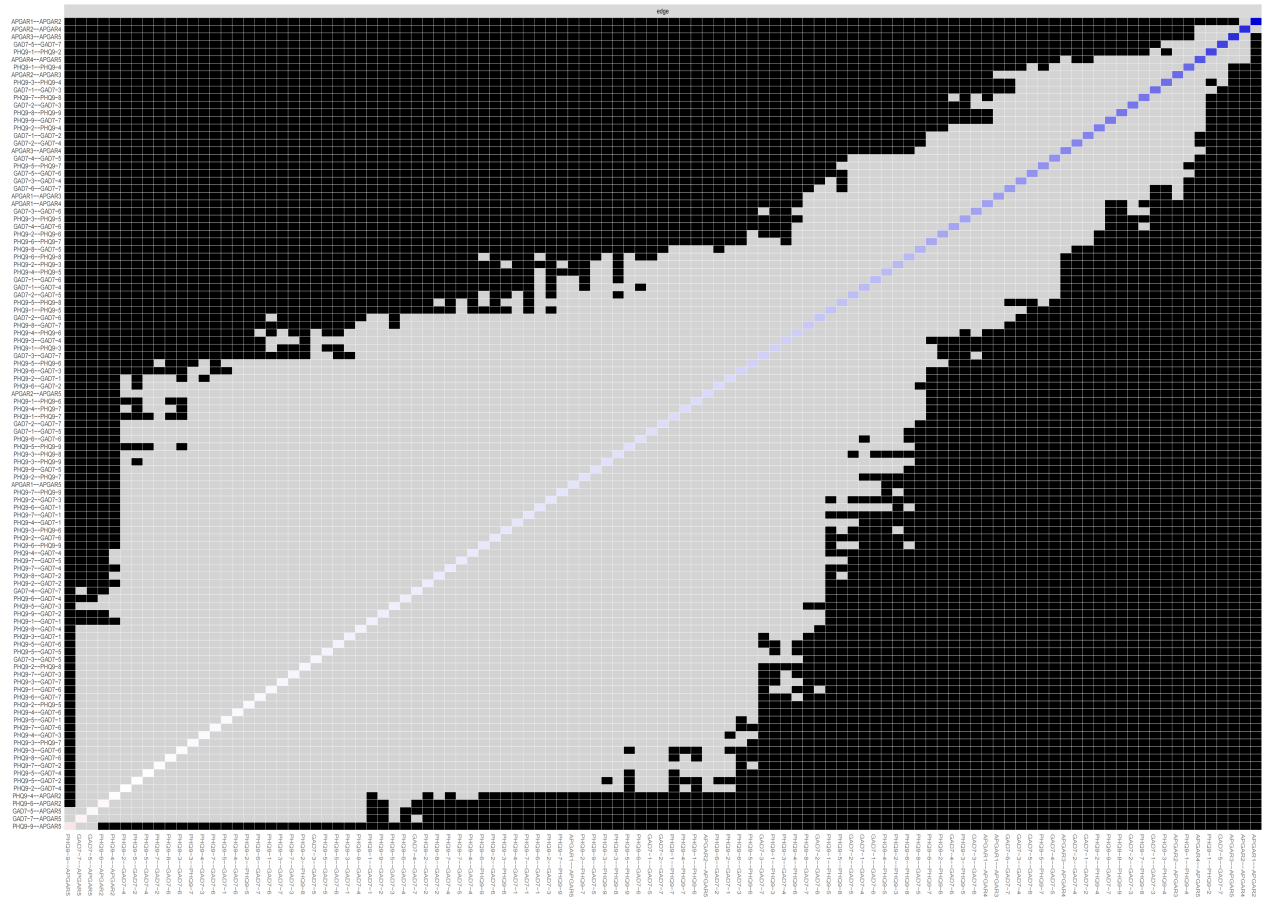


**Figure S3.** Estimation of edge weight difference by bootstrapped difference test. The network was subject to bootstrapped difference tests to examine differences between edge weights. Edges that did not exhibit significant differences are depicted in gray boxes, while those that did are shown in black boxes. The diagonal line of colored boxes represents the edge weight colors in the variable network. Blue boxes indicate a positive relationship, while light red boxes indicate negative relationships.

**
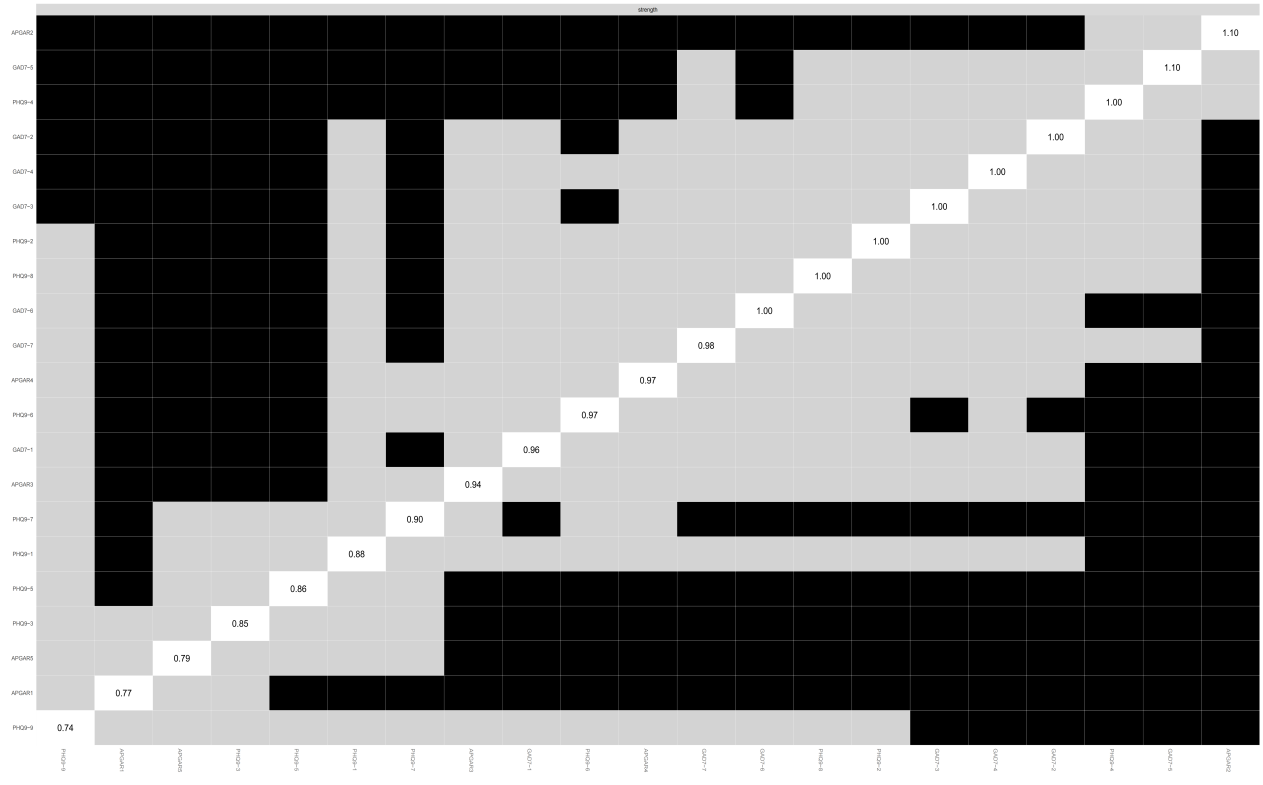
**

**Figure S4.** Estimation of node strength difference by bootstrapped difference test. The nodes were compared to each other, with gray boxes indicating nodes that did not exhibit significant differences and black boxes representing nodes that did. White boxes, on the other hand, represent the values of the node strength.


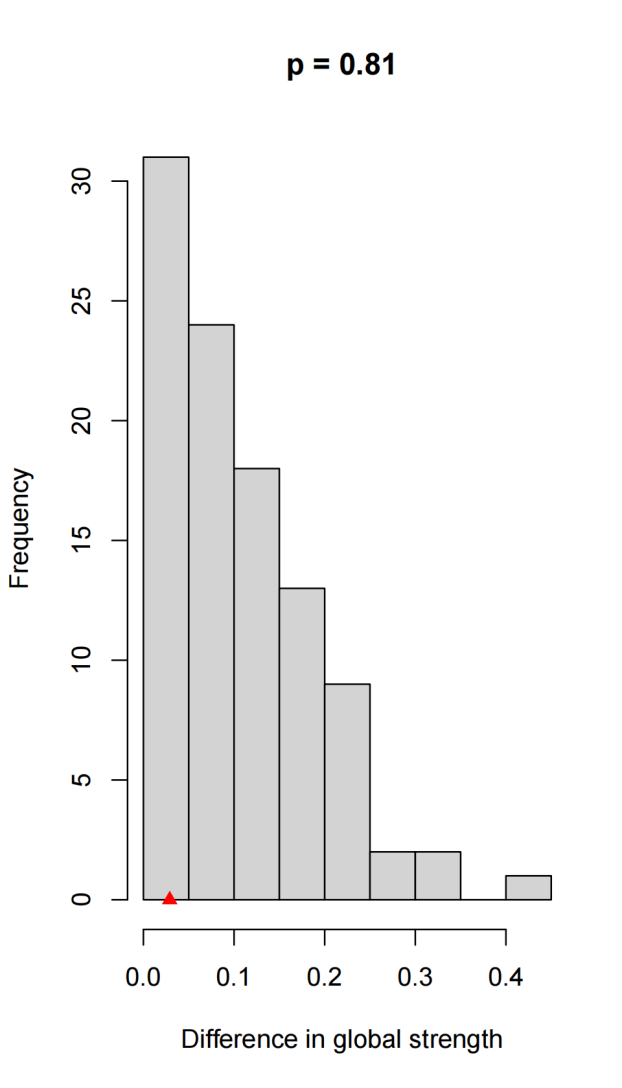

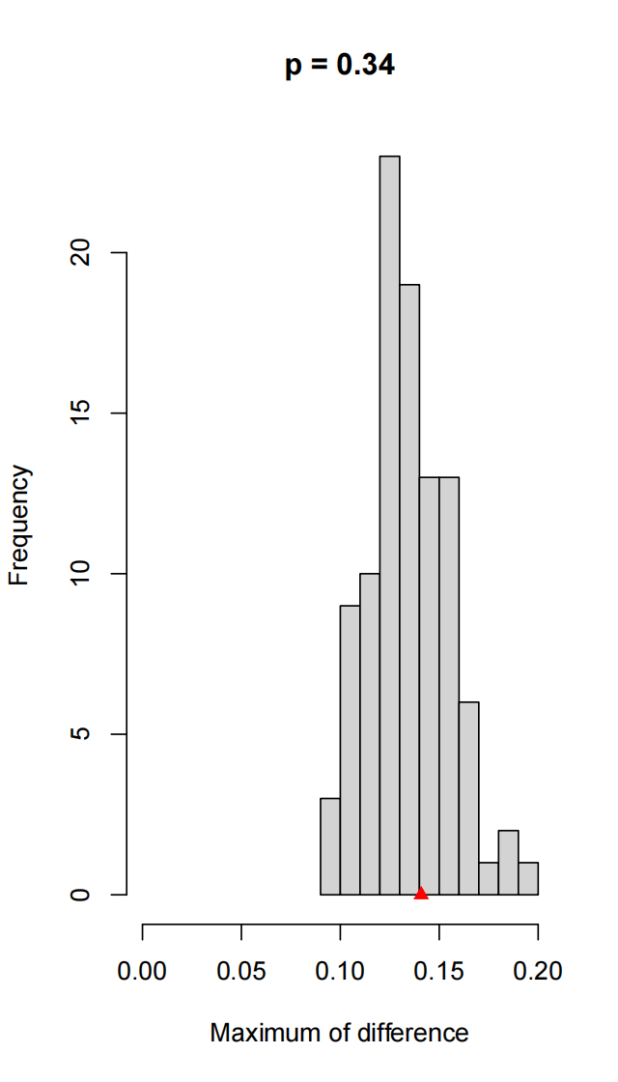


B ).

A ).

Figure S5. Longitudinal NCT results. (A) Network edge invariance test. (B) Network global invariance test.


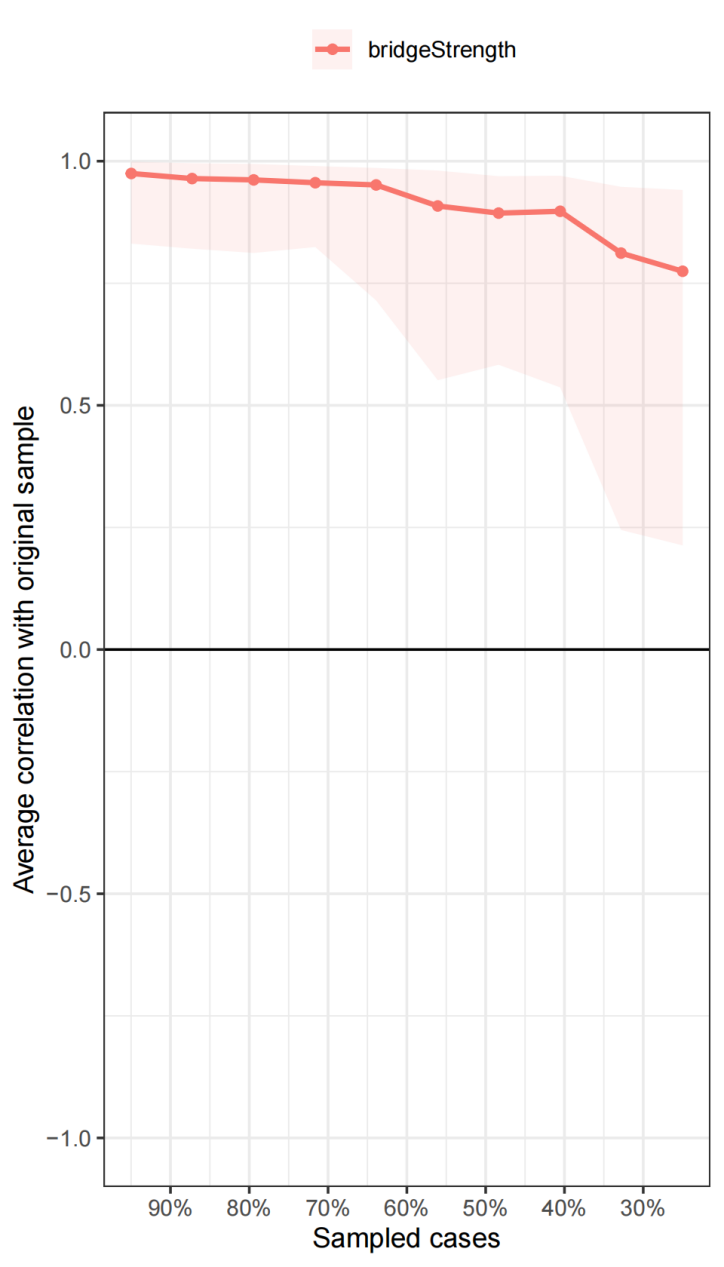

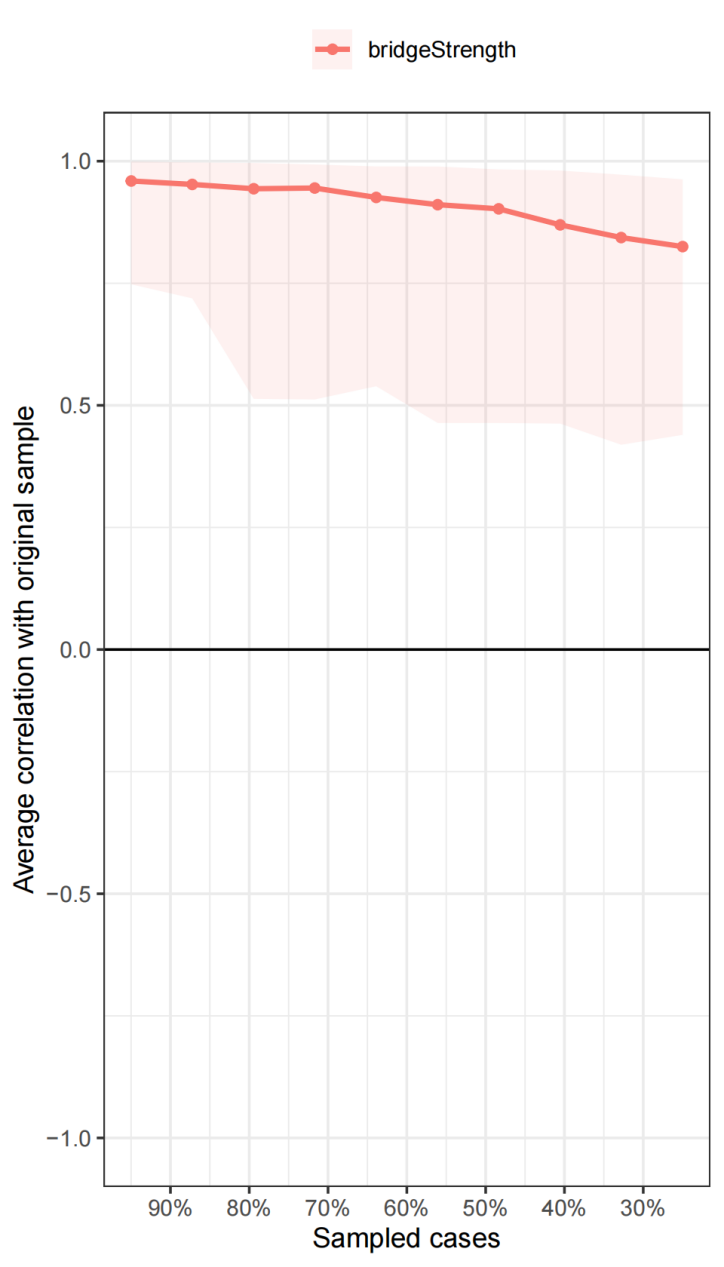


a2. male bridge strength

a1.female bridge strength


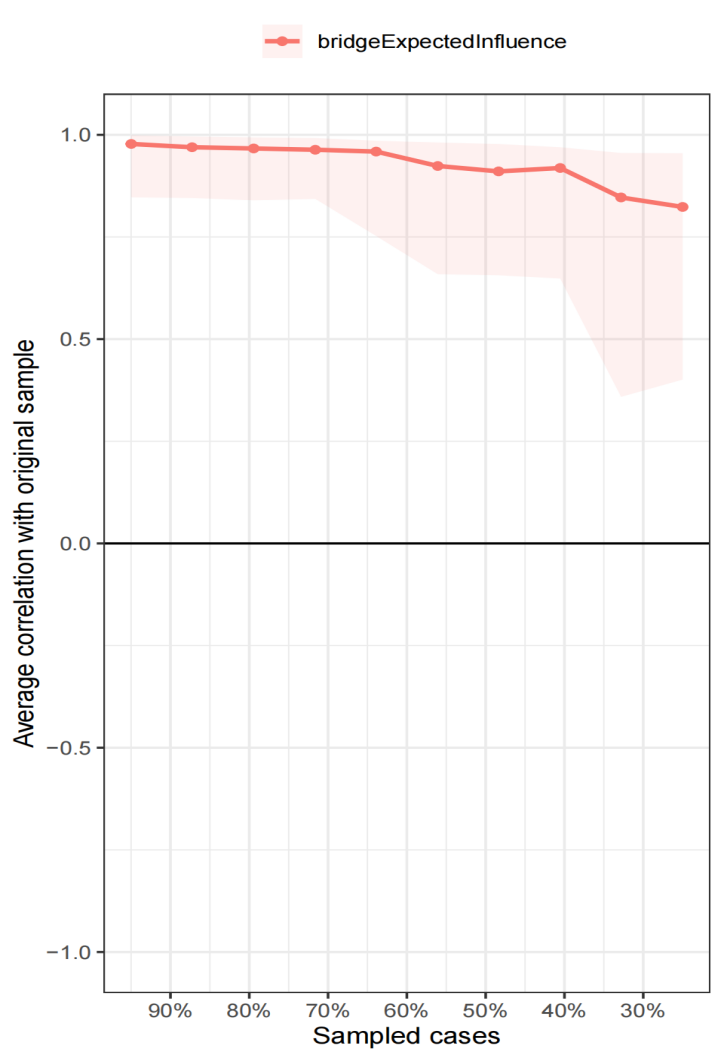

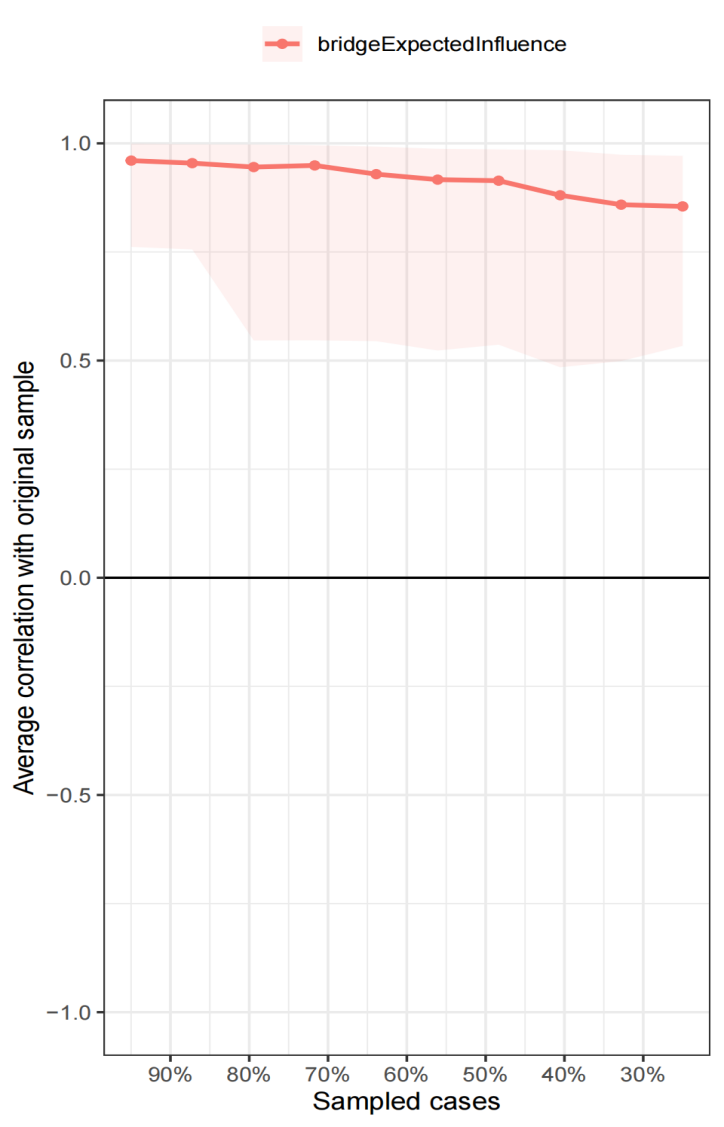


b2. male bridge expected Influence

b1.female bridge expected Influence

Figure S6. Centrality bridge stability coefficient (CS-coefficients) a. bridge strength b. bridge Expected Influence
